# Supplementary material for: Effectiveness of fullerene/magnesium oxide nanocomposite in removing ciprofloxacin and tetracycline from aqueous solutions
Source: Royal Society of Chemistry journal article supplement (doi:10.1039/d4ra07938h), 2025-01-01
Supplement: d4ra07938h1.pdf [file d4ra07938h1.pdf]

### Preparation of MgO NFs

Briefly, 10 g of  $\text{MgCl}_2$  anhydrous was dissolved in 100 ml of distilled water, and ammonia solution (1 N) was added drop-wise at 50 °C under vigorous stirring till the solution pH reached 10. The resulting white precipitate of  $\text{Mg}(\text{OH})_2$  was centrifuged for 5 min at 3000 rpm. Subsequently, it was washed with distilled water three times and then dried overnight at 110 °C. The dried powder was finally calcined at 500 °C in a muffle furnace for 3 h to obtain MgO NFs.

#### Text 1

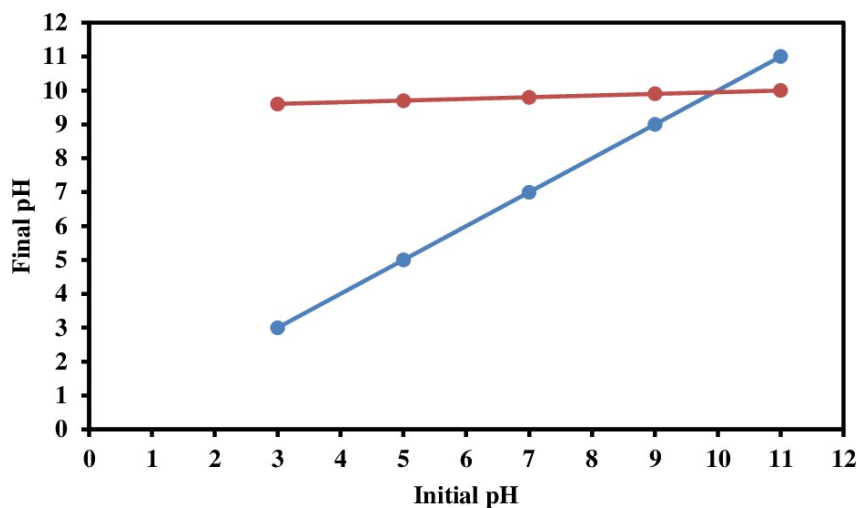

Fig. S1: Zeta Potential of F/MgO Nanocomposite at Different pH

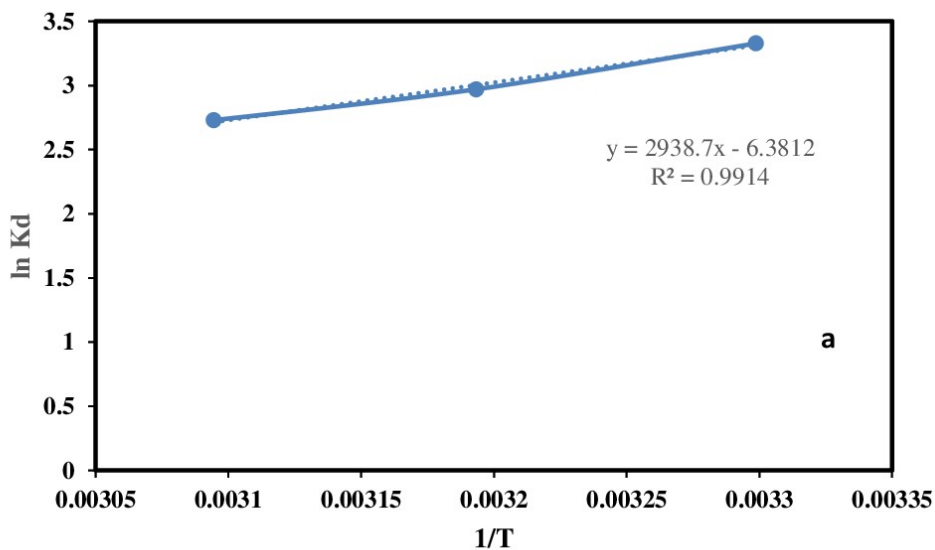

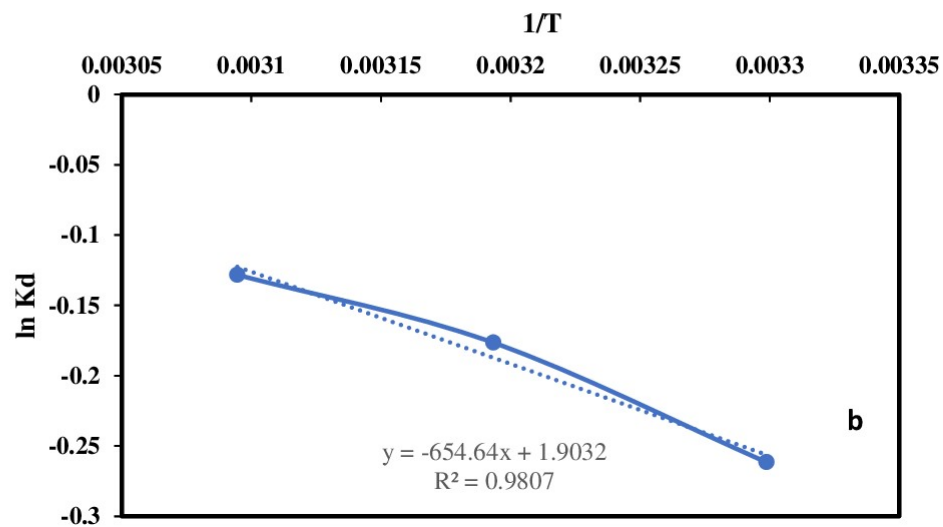

Fig. S2: Thermodynamic Model for CIP (a), TC (b)

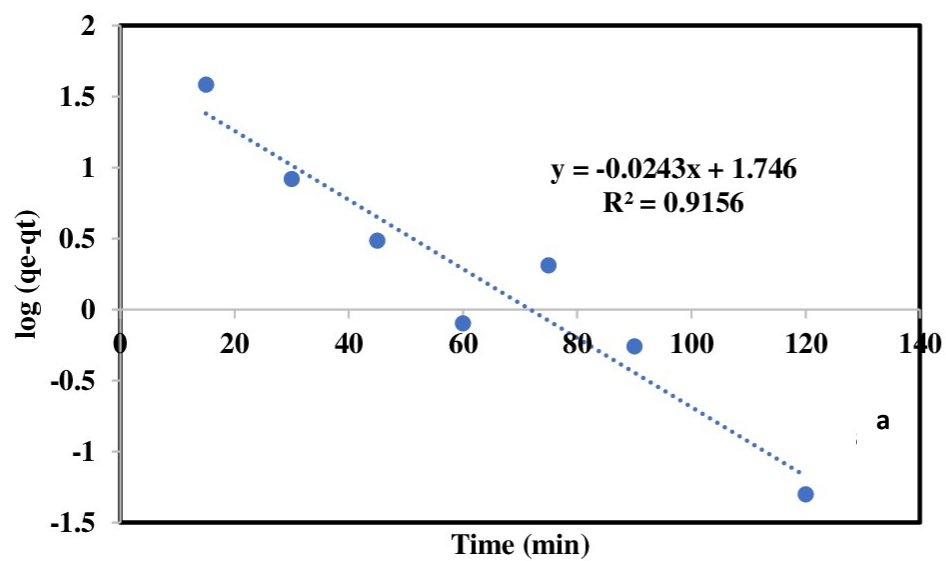

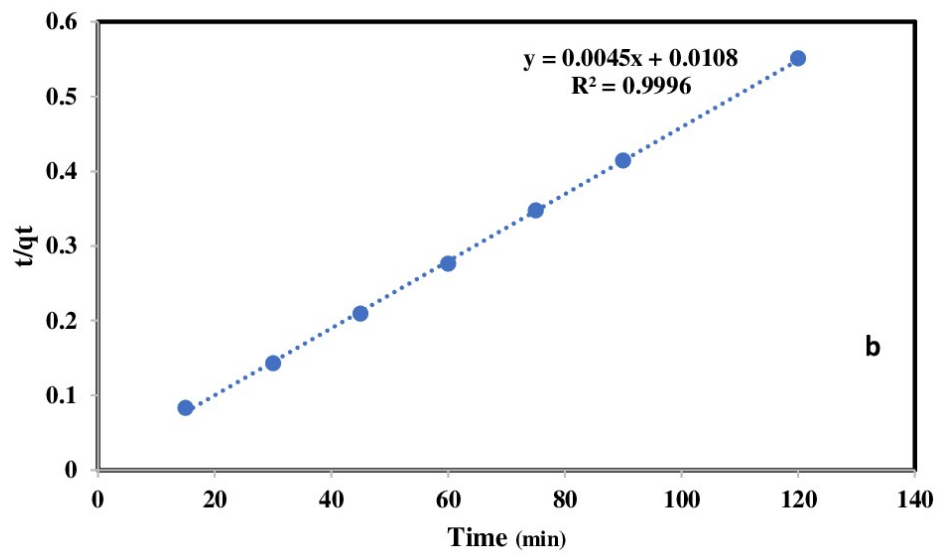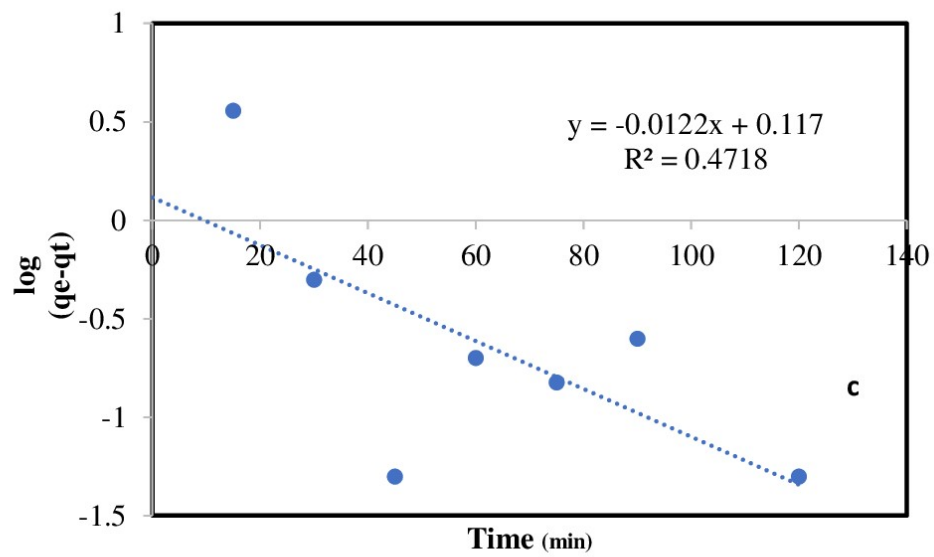

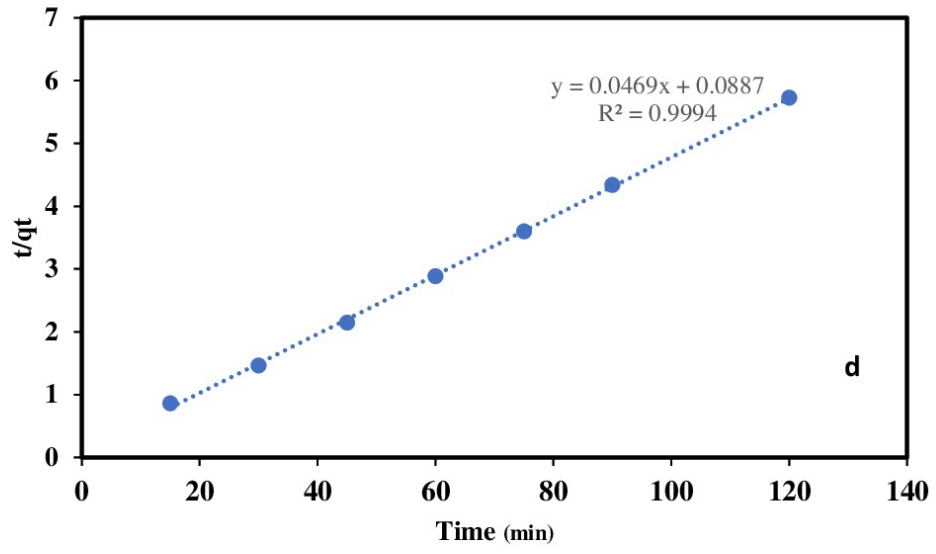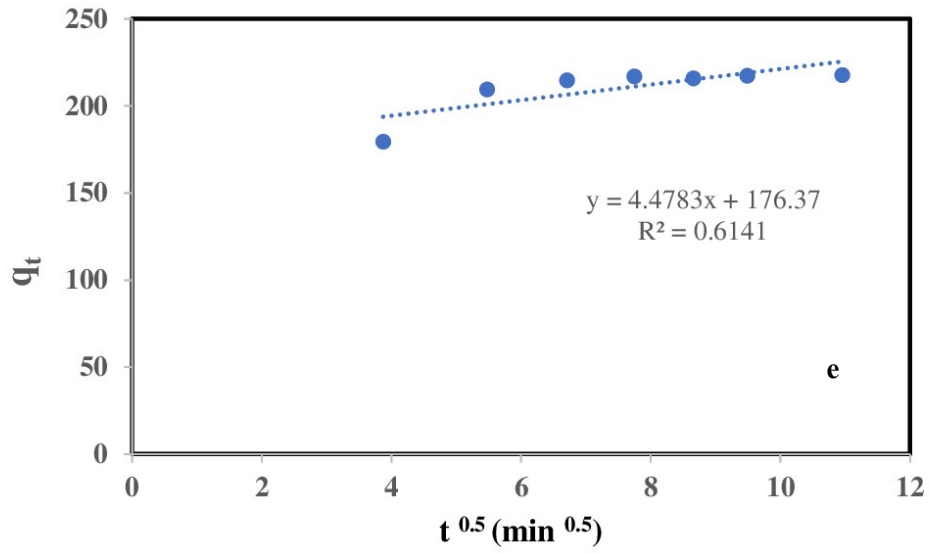

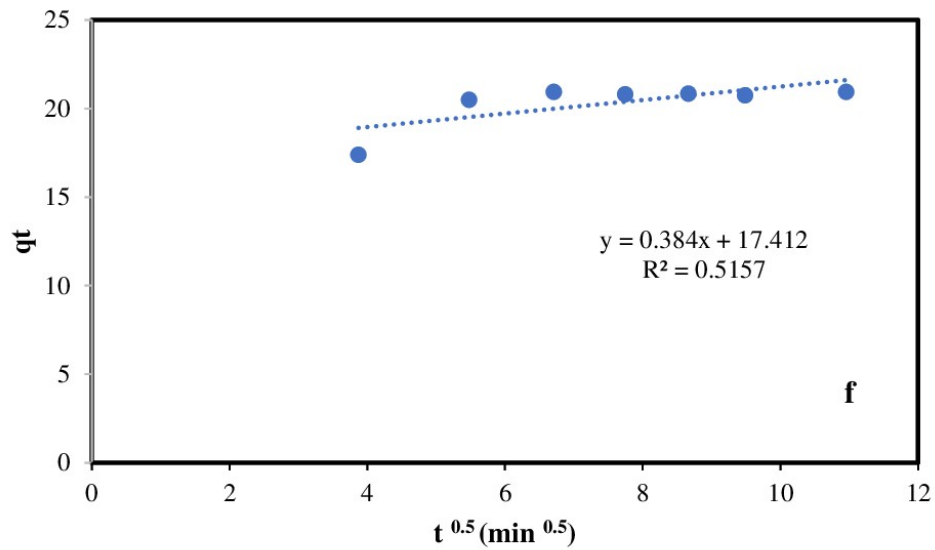

**Fig. S3:** Pseudo-first order Model (a), Pseudo-second order Model of CIP on F/MgO (b), Pseudo-first order Model (c), Pseudo-second order Model of TC on F/MgO (d), Intraparticle diffusion model of CIP (e), of TC (f)

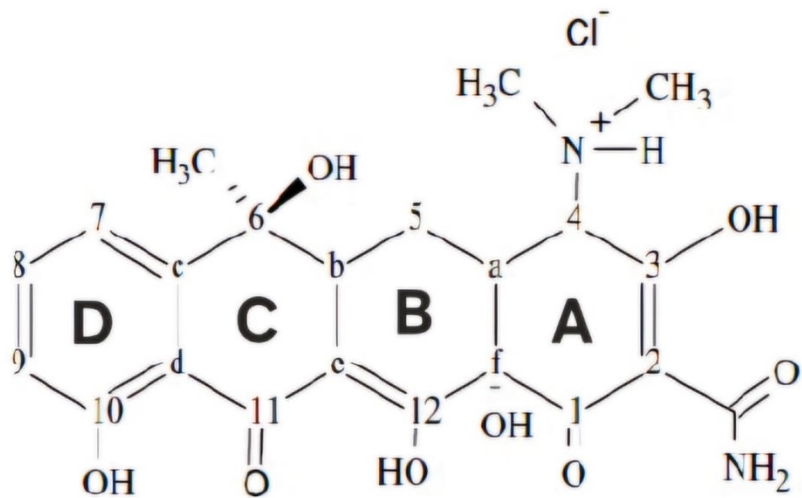

**Fig. S4:** Molecular Structure of Tetracycline Hydrochloride
